# Supplementary material for: BCNO silica gel-based green transparent and efficient luminescent downshifting layer for Si solar cells
Source: Royal Society of Chemistry journal article supplement (doi:10.1039/d1se00142f), 2021-01-01
Supplement: d1se00142f1.pdf [file d1se00142f1.pdf]

## Supporting information

### BCNO silica gel based green transparent and efficient luminescence down shifting layer for Si solar cell

S. Sekar<sup>ab</sup>, S. Venkataprasad Bhat<sup>ac\*</sup>.

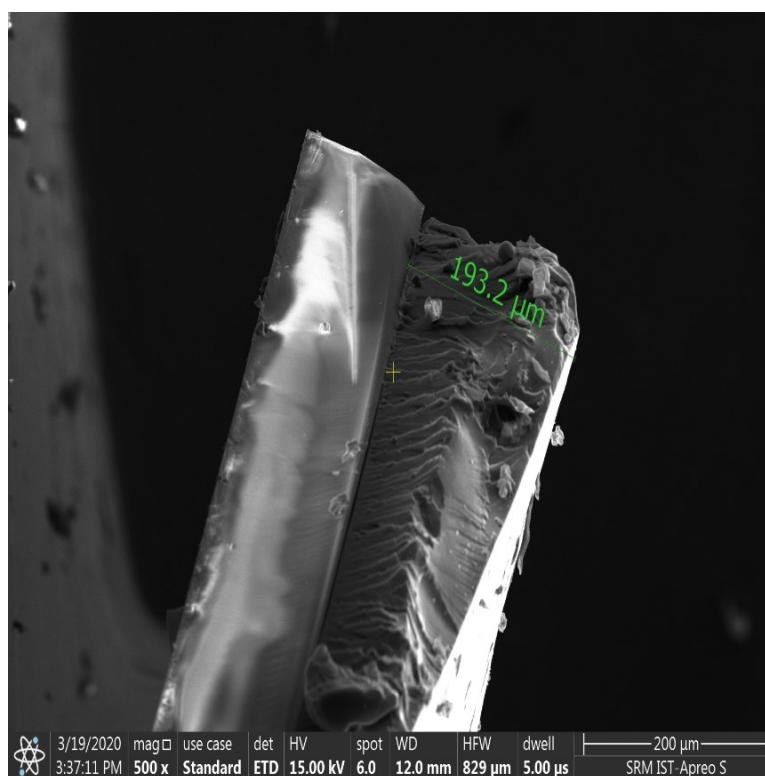

**FigureS1.** Cross-section SEM image of BCNO silica gel (LDS layer) coated on a glass substrate.

### Quantum yield measurement

The quantum yield of BCNO silica gel was measured in liquid mode using integrating sphere.

The sample for the measurement was prepared using ethanol as the solvent. 100μL of BCNO silica gel was added to 5ml of ethanol followed by stirring for 10 minutes at room temperature. The excitation and emission spectra was recorded for both blank and BCNO

29 silica gel sample. Finally the quantum yield of BCNO silica gel was obtained by using these  
30 measured spectra as inputs in quanta pi software of the Flurolog system.

### 31 **Photostability test**

32 To assess the photostability of the BCNO silica gel, aging test was carried out under the  
33 illumination of UV light (354 nm, 100 W cm<sup>-2</sup> irradiance) in ambient for 250 and 500 hours.

34 As shown in Figure (S2), there was about ~35% decrease in the emission intensity for the  
35 BCNO silica gel after 250 hours of UV exposure and the decrease was 55% after 500 hours  
36 of UV irradiance. The observed photostability of the BCNO silica gel, exhibiting the  
37 emission property even after 500 hours of UV irradiation, indicates that it can be an good  
38 alternative material for LDS layers as compared to the reported luminophores<sup>1, 2, 3</sup>. The  
39 photostability can be improved further by designing appropriate ligand structure<sup>4, 5</sup>.

40

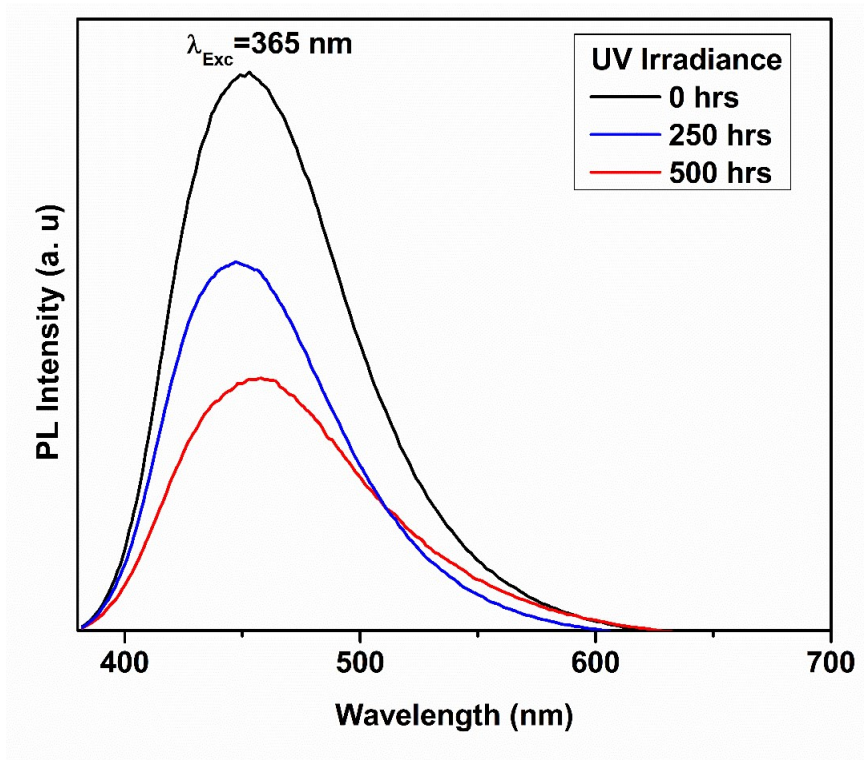

41

42 **Figure S2.** Photoluminescence spectra of BCNO silica gel under UV-irradiation (100W cm<sup>-2</sup>)

43

#### 44 **Measurements with commercial Si solar cell**

45 The performance of BCNO silica gel LDS layer was also tested using a commercial Si solar  
46 cell. The current density-voltage (J-V) curves of the commercial Si solar cell were recorded  
47 with and without the LDS layer at standard testing conditions and the results were compared.  
48 The values of the photovoltaic parameters such as  $V_{oc}$ ,  $J_{sc}$ , fill factor (FF) and power  
49 conversion efficiency (PCE) as obtained from the measurements were tabulated (table S1).  
50 The performance of LDS layer was again proved with the commercial Si solar cells, leading  
51 to the enhancement of PCE from 18% to 18.8 % for glass/LDS layer/Si-solar cell  
52 configuration and from 18% to 18.6 % for LDS layer/glass/Si-solar cell configuration.

53

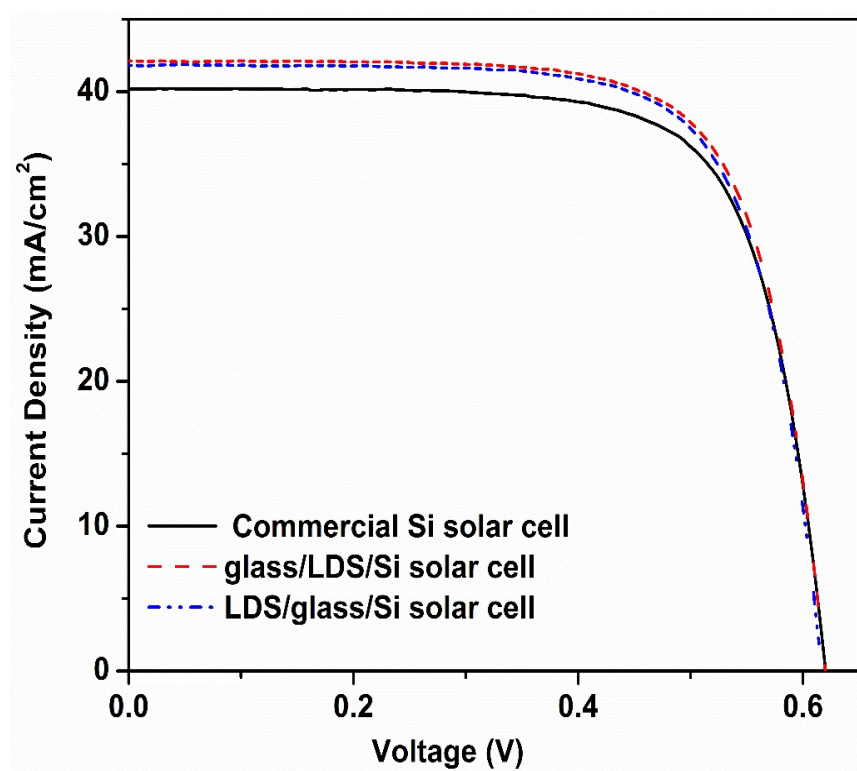

54

55 **FigureS3.** Current-Voltage characteristics of commercial Si solar cell with BCNO silica gel  
56 layer.

57

58

59 **Table S1.** Performance parameters of Si-solar cell with and without the BCNO silica gel  
 60 LDS layer, compared with reports in literature using other LDS layers with Si solar cell.

|                                                                                         | Voc (mV)    | Jsc (mA/cm <sup>2</sup> ) | Fill factor (%) | Efficiency (%) | Percentage of improvement |            |
|-----------------------------------------------------------------------------------------|-------------|---------------------------|-----------------|----------------|---------------------------|------------|
| Si-solar cell (ref)                                                                     | 616 ± 1.55  | 30.6 ± 0.18               | 72.04 ± 0.007   | 13.61 ± 0.11   |                           | (our work) |
| LDS layer/glass/Si-solar cell                                                           | 616 ± 1     | 31.83 ± 0.36              | 72.18 ± 0.06    | 14.15 ± 0.17   | 3.8%                      |            |
| glass/LDS layer/Si-solar cell                                                           | 617 ± 0.5   | 32.80 ± 0.1               | 72.20 ± 0.06    | 14.60 ± 0.05   | 7.1%                      |            |
| Commercial Si-solar cell (ref)                                                          | 619         | 39.99                     | 72.7            | 18             |                           |            |
| LDS layer/glass/commercial solar cell                                                   | 616         | 41.63                     | 72.61           | 18.64          | 3.3%                      |            |
| glass/LDS layer/commercial solar cell                                                   | 619         | 41.9                      | 72.64           | 18.85          | 4.5%                      |            |
| Si Solar cell (ref)                                                                     | 543.4 ± 6.8 | 32.5 ± 0.6                | 68.0 ± 0.9      | 12.0 ± 0.2     | 11.7%                     | (ref# 53)  |
| Si Solar cell with CdSe/CdS QDs                                                         | 545.9 ± 3.4 | 37.0 ± 0.6                | 67.0 ± 1.0      | 13.5 ± 0.2     |                           |            |
| c-Si solar cell (ref)                                                                   | 590         | 38.67                     | 61.6            | 14.05          | 5.8%                      | (ref# 55)  |
| c-Si SC with LDS layer (CH <sub>3</sub> NH <sub>3</sub> PbBr <sub>3</sub> quantum dots) | 600         | 40.23                     | 62.1            | 14.99          |                           |            |
| mc-Si solar cell (ref)                                                                  | 570         | 32.35                     | 56.6            | 10.44          |                           |            |
| mc-Si SC with LDS layer(CH <sub>3</sub> NH <sub>3</sub> PbBr <sub>3</sub> quantum dots) | 590         | 33.02                     | 58.1            | 11.32          | 8.2%                      |            |
| c-Si solar cell (ref)                                                                   | --          | 35.8                      | 69.2            | 15.2           | 0.65%                     | (ref# 56)  |
| c-Si solar cells coated with LDS layer (Eu(tta) <sub>3</sub> pybox)                     | --          | 36.1                      | 69.1            | 15.3           |                           |            |
| mc-Si solar cell (ref)                                                                  | 604.6       | 37.85                     | 71.81           | 16.43          | 3.6%                      | (ref#57)   |
| mc-Si cell/EVA/Gd <sub>2</sub> O <sub>3</sub> :Tb <sup>3+</sup>                         | 608.0       | 38.81                     | 72.15           | 17.02          |                           |            |
| Si solar cell (ref)                                                                     | 600         | 41.18                     | 68              | 17.06          | 1.1%                      | (ref#58)   |
| Si solar cell with LDS (Ba <sub>2</sub> SiO <sub>4</sub> :Eu <sup>2+</sup> )            | 600         | 41.51                     | 68              | 17.25          |                           |            |
| Si Solar Cell (ref)                                                                     | 542.3       | 28.24                     | 78.21           | 11.97          | 13.7%                     | (ref#59)   |
| Si Solar cell /Eu-doped silicate phosphor-610 nm                                        | 549.1       | 32.50                     | 77.01           | 13.74          |                           |            |

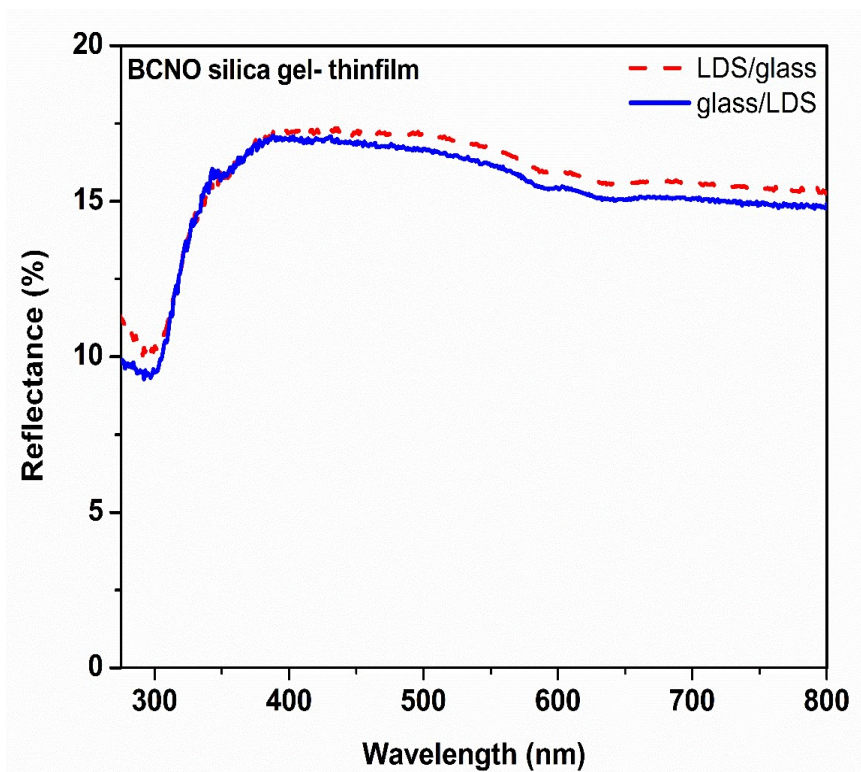

61

62 **Figure S4.** Reflectance spectra of BCNO silica gel LDS layer /glass and glass/BCNO silica  
63 gel LDS layer.

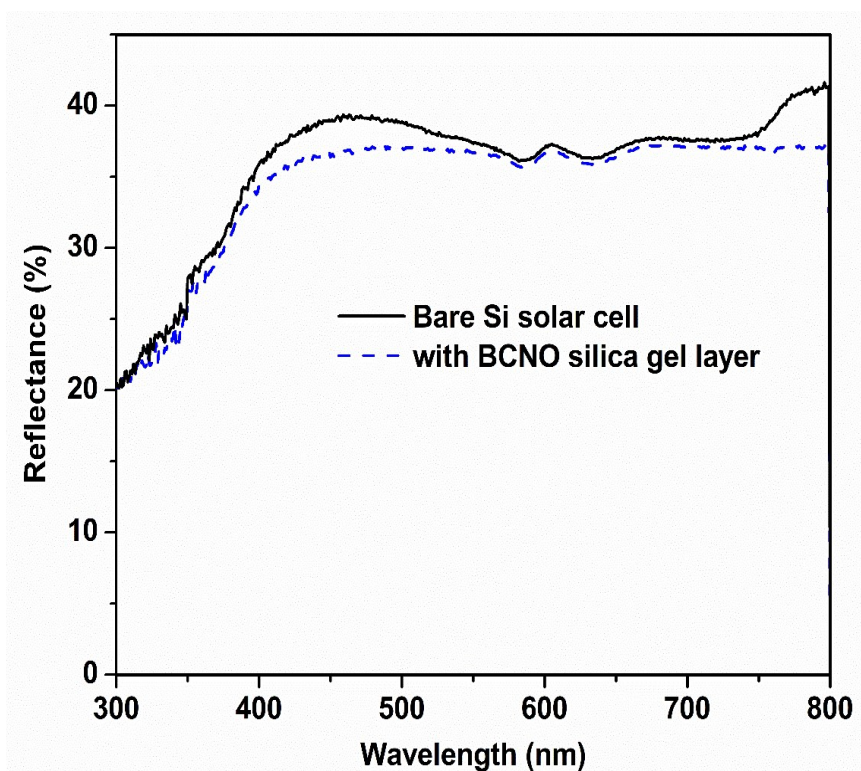

64

65 **Figure S5.** Reflectance from the surface of the Si solar cell with and without BCNO  
66 silica gel layer.

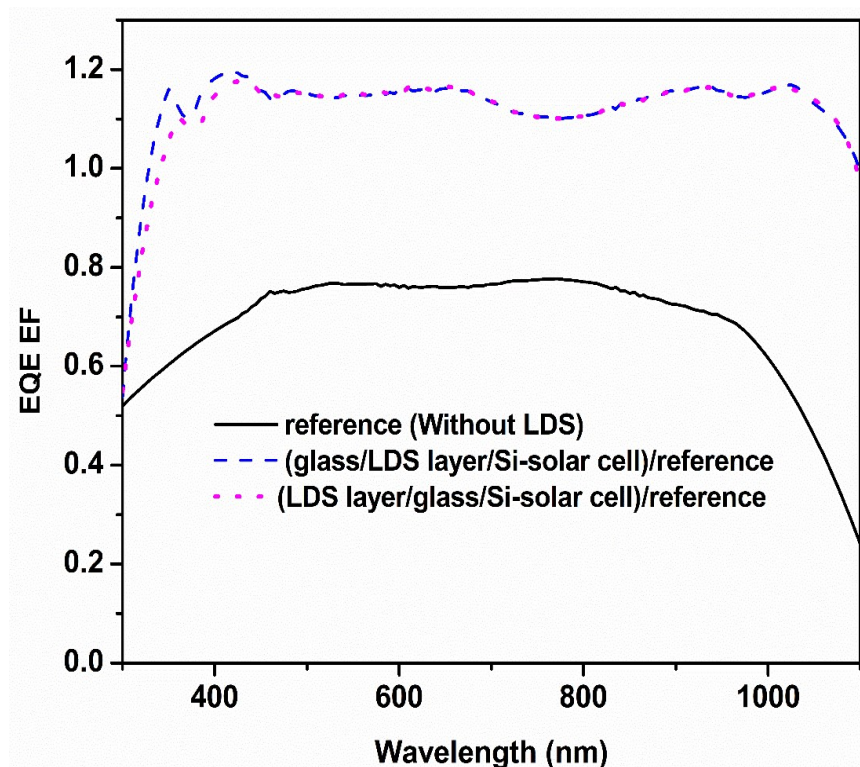

67

68 **Figure S6.** External quantum efficiency Enhancing Factor of BCNO silica gel LDS

69 layer.

70

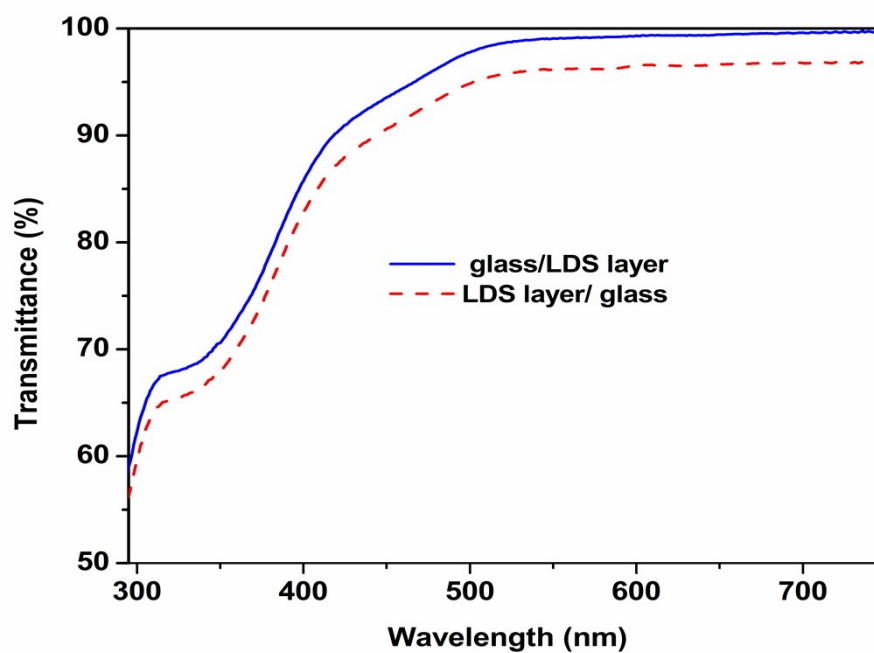

71

72 **Figure S7.** Transmittance spectra of BCNO silica gel layer in both LDS layer/glass and  
73 glass/LDS layer configurations.

74

75 **References**

- 76 1. L. Meng, X.G.Wu, S. Ma, L. Shi, M. Zhang, L. Wang, H. Zhong. Improving the  
77 efficiency of silicon solar cells using in situ fabricated perovskite quantum dots as  
78 luminescence downshifting materials. *Nanophotonics*, 2019, **9(1)**, 93–100.
- 79 2. E. Moretti, A. Talon, L. Storaro, A. Le Donne, S. Binetti, A. Benedetti, S.  
80 Polizzi. Concentration quenching and photostability in Eu(dbm)<sub>3</sub>phen embedded in  
81 mesoporous silica nanoparticles. *Journal of Luminescence*, 2014, **146**, 178–185.
- 82  
83 3. K. Binnemans. Lanthanide-Based Luminescent Hybrid Materials. *Chemical Reviews*,  
84 2009, **109(9)**, 4283–4374.
- 85 4. H. Wei, Z. Zhao, C. Wei, G. Yu, Z. Liu, B. Zhang, J. Bian, Z. Bian and C.  
86 Huang. Antiphotobleaching: A Type of Structurally Rigid Chromophore Ready for  
87 Constructing Highly Luminescent and Highly Photostable Europium Complexes, *Adv.*  
88 *Funct. Mater.* 2016, **26**, 2085–2096.
- 89 5. Y. Wang, P. G. Wilczynsk, X. Zhang, J. Yin, Y. Wen and H. Li. Photovoltaic  
90 efficiency enhancement of polycrystalline silicon solar cells by a highly stable  
91 luminescent film. *Sci China Mater* 2020, **63(4)**, 544–551.
